# Supplementary material
Source: ML conference proceedings conference paper supplement (https://openaccess.thecvf.com/content/ICCV2025/html/Du_GS-ID_Illumination_Decomposition_ICCV_2025_paper.html)
Supplement: Supplementary file 1 [file 00659_supp.pdf › 00659_supp.pdf]

# GS-ID: Illumination Decomposition on Gaussian Splatting via Adaptive Light Aggregation and Diffusion-Guided Material Priors

## Supplementary Material

This supplementary material provides a detailed description of our method’s implementation, followed by additional results from various datasets. We then introduce a new experiment to compare the illumination decomposition results under simple and complex light sources, reinforcing the arguments presented in the main paper. Finally, we present further application results. The supplementary material video files include additional videos demonstrating our work.

### 1. Implementation Details

We implement GS-ID using CUDA extensions and modify 3DGS to output G-buffer properties, including albedo, roughness, metallic, normal, and depth, visibility vector.

#### 1.1. Representation

In the vanilla 3DGS, each 2D Gaussian utilizes learnable parameters  $\mathcal{T} = \{\mathbf{p}, \mathbf{s}, \mathbf{q}\}$  and  $\mathcal{C} = \{\alpha, \mathbf{f}_c, \mathbf{N}, \mathbf{D}\}$  to describe its geometric properties and volumetric appearance, respectively. Here,  $\mathbf{p}$  denotes the position vector,  $\mathbf{s}$  denotes the scaling vector,  $\mathbf{q}$  denotes the unit quaternion for rotation,  $\alpha$  denotes the opacity,  $\mathbf{N}$  denotes the normal,  $\mathbf{D}$  denotes the depth, and  $\mathbf{f}_c$  denotes the spherical harmonics (SH) coefficients for view-dependent color. In GS-ID, we extend  $\mathcal{C}$  to  $\{\alpha, \mathbf{f}_c, \mathbf{N}, \mathbf{D}, \mathbf{A}, R, M\}$  to describe the material properties of the 2D Gaussian, and  $\mathbf{A}, R, M$  denote Albedo, Roughness, and Metallic values. Additionally, on each pixel in screen space, we can calculate the world space positions  $\mathbf{P}$  by rasterizing  $\mathbf{D}$  with the camera transformation matrix.

#### 1.2. Training Details

Our training pipeline consists of two stages: pre-20k and post-10k iterations.

**Pre-20k Stage.** The primary goal of this stage is to establish a stable geometric structure, particularly accurate surface normals and point positions for rasterization. We run 20k iterations using a modified 3D Gaussian Splatting (3DGS) framework, where surface normals predicted by a pretrained diffusion model serve as supervision. This stage ensures geometric consistency before introducing illumination modeling.

**Post-10k Stage.** In this stage, we freeze the Gaussian point positions and use the modified 3DGS to predict G-Buffer components, including albedo, roughness, metallic, and a unit shadow direction vector. These outputs are supervised by corresponding maps generated from the diffusion model. Subsequently, we optimize our illumination model, which

comprises a set of learnable spherical Gaussian mixtures (SGMs) and a trainable environment light. We introduce a lighting regularization term and train for an additional 10k iterations. The final supervision is provided by comparing rendered RGB images against ground truth.

$$f_r(\omega_i, \omega_o) = \underbrace{(1 - M) \frac{\mathbf{A}}{\pi}}_{\text{diffuse component}} + \underbrace{\frac{DFG}{4(\mathbf{n} \cdot \omega_i)(\mathbf{n} \cdot \omega_o)}}_{\text{specular component}},$$

$$\mathbf{h} = \text{normalize}(\omega_o + \omega_i),$$

$$F_0 = (1 - M) \cdot 0.04 + M \cdot \mathbf{A},$$

$$D(\mathbf{n}, \mathbf{h}) = \frac{R^4}{\pi (\mathbf{n} \cdot \mathbf{h} (R^4 - 1) + 1)^2},$$

$$F(\omega_i, \mathbf{n}) = F_0 + (1 - F_0) (1 - \mathbf{n} \cdot \omega_i)^5,$$

$$G(\omega_o, \omega_i, \mathbf{h}) = G_1(\omega_o, \mathbf{h}) \cdot G_1(\omega_i, \mathbf{h}),$$

$$G_1(\mathbf{n}, \mathbf{h}) = \frac{1}{1 + \mathbf{n} \cdot \mathbf{h} \sqrt{R^4 + \mathbf{n} \cdot \mathbf{h} - R^4 \cdot \mathbf{n} \cdot \mathbf{h}}}, \quad (1)$$

where  $\mathbf{A}$ ,  $R$ , and  $M$  denote the albedo, roughness, and metallic, respectively. The Normal Distribution Function (NDF)  $D$ , Fresnel function  $F$ , and Geometry function  $G$  are derived from physical materials. We use the Adam optimizer for training, and the training process is divided into three stages.

We employ a mixture model of a set of spherical Gaussians (SGMs) to represent the localized highlight illumination as  $L_o^{\text{SGMs}}(\mathbf{x}, \omega_o)$ :

$$L_o^{\text{SGMs}}(\mathbf{x}, \omega_o) = \sum_i^{N_{\text{light}}} \frac{f_{r_i}^{\text{SGM}}(\mathbf{n} \cdot \omega_i) * \mathbf{V}_i}{d_i^2} \sum_j^{N_{\text{sg}}} W_{i,j} SG(j), \quad (2)$$

where  $d_i$  denotes the distance from the  $i$ -th spherical Gaussian mixture to the surface point  $\mathbf{x}$ .  $f_{r_i}^{\text{SGM}}$  denotes the BRDF function, and  $SG$  denotes the spherical Gaussian Function, respectively, as defined in the Methodology section. Each spherical Gaussian mixture contains  $N_{\text{SG}}$  spherical Gaussians. Utilizing pretrained 3DGS  $\mathcal{T}$  and  $\mathcal{C}$ , along with supervision of material properties generated by a pretrained diffusion model, we optimize  $M$  and  $L$  over 15,000 iterations. The optimization is guided by the following loss function:

$$\mathcal{L}_{\text{reg}} = \lambda_R \text{L1}(R, \hat{R}) + \lambda_M \text{L1}(M, \hat{M}) + \lambda_A \text{L1}(\mathbf{A}, \hat{\mathbf{A}}), \quad (3)$$

where the weights for the loss function are set as:  $\lambda_R = 0.1$ ,  $\lambda_M = 0.1$ , and  $\lambda_A = 0.5$ . The entire illumination optimization process can be visualized as shown in Figure 1.

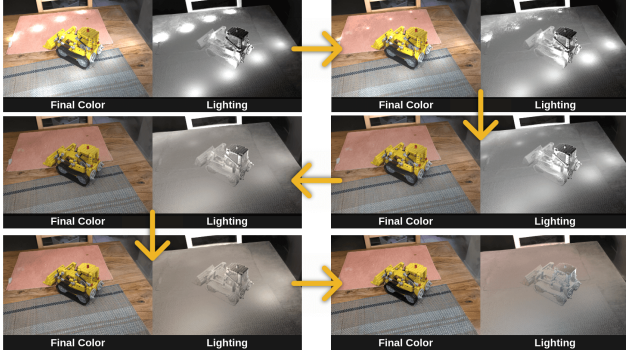

Figure 1. We optimize for  $N_{\text{light}}$  light sources with SGs, in conjunction with a learnable environment map. Our representation is sufficiently expressive to capture detailed emissions while remaining controllable for light editing purposes.

## 2. Results on the MipNeRF 360, DB, and T&T Datasets

Tabs. 1, 2, and 3 present the results for novel view synthesis using the Mip-NeRF 360 Dataset. Tabs. 4, 5, and 6 display the results for Deepblend and the T&T Dataset. Additionally, Figure 3 illustrates the ID results for these scenes.

## 3. Results on the TensoIR Synthetic Dataset

Table 8 presents the outcomes for normal estimation, novel view synthesis, albedo reconstruction, and relighting across all four scenes.

## 4. Results on the ADT Dataset

Table 8 presents the outcomes for albedo estimation and novel view synthesis across all four scenes.

| Method                    | bicycle | flowers | garden | stump | treehill | room  | counter | kitchen | bonsai |
|---------------------------|---------|---------|--------|-------|----------|-------|---------|---------|--------|
| NeRF++                    | 22.64   | 20.31   | 24.32  | 24.34 | 22.20    | 28.87 | 26.38   | 27.80   | 29.15  |
| Plenoxels                 | 21.91   | 20.10   | 23.49  | 20.66 | 22.25    | 27.59 | 23.62   | 23.42   | 24.67  |
| INGP-Base                 | 22.19   | 20.35   | 24.60  | 23.63 | 22.36    | 29.27 | 26.44   | 28.55   | 30.34  |
| INGP-Big                  | 22.17   | 20.65   | 25.07  | 23.47 | 22.37    | 29.69 | 26.69   | 29.48   | 30.69  |
| Mip-NeRF 360              | 24.40   | 21.64   | 26.94  | 26.36 | 22.81    | 29.69 | 26.69   | 29.48   | 30.69  |
| 3DGS                      | 25.25   | 21.52   | 27.41  | 26.55 | 22.49    | 30.63 | 28.70   | 30.32   | 31.98  |
| 2DGS                      | 24.87   | 21.15   | 26.95  | 26.47 | 22.27    | 31.06 | 28.55   | 30.50   | 31.52  |
| GaussianShader            | 23.12   | 20.34   | 26.44  | 23.92 | 20.17    | 24.27 | 26.35   | 27.72   | 28.09  |
| GSIR                      | 23.80   | 20.57   | 25.72  | 25.37 | 21.79    | 28.79 | 26.22   | 27.99   | 28.18  |
| Ours (3 <sup>3</sup> SGs) | 24.41   | 20.90   | 26.76  | 24.35 | 22.01    | 30.47 | 27.42   | 29.95   | 30.18  |

Table 1. PSNR scores for Mip-NeRF360 scenes.

## 5. Applications

**Light Editing** The use of a spherical Gaussian (SG) mixture for lighting provides a flexible and intuitive representation of scene illumination. After training, the emission weights,

| Method                    | bicycle | flowers | garden | stump | treehill | room  | counter | kitchen | bonsai |
|---------------------------|---------|---------|--------|-------|----------|-------|---------|---------|--------|
| NeRF++                    | 0.526   | 0.453   | 0.635  | 0.594 | 0.530    | 0.530 | 0.802   | 0.816   | 0.876  |
| Plenoxels                 | 0.496   | 0.431   | 0.606  | 0.523 | 0.509    | 0.842 | 0.759   | 0.648   | 0.814  |
| INGP-Base                 | 0.491   | 0.450   | 0.649  | 0.574 | 0.518    | 0.855 | 0.798   | 0.818   | 0.890  |
| INGP-Big                  | 0.512   | 0.486   | 0.701  | 0.594 | 0.542    | 0.871 | 0.817   | 0.858   | 0.906  |
| Mip-NeRF 360              | 0.693   | 0.583   | 0.816  | 0.746 | 0.632    | 0.913 | 0.895   | 0.920   | 0.939  |
| 3DGS                      | 0.771   | 0.605   | 0.868  | 0.775 | 0.638    | 0.914 | 0.905   | 0.922   | 0.938  |
| 2DGS                      | 0.752   | 0.588   | 0.852  | 0.765 | 0.627    | 0.912 | 0.900   | 0.919   | 0.933  |
| GaussianShader            | 0.700   | 0.542   | 0.842  | 0.667 | 0.572    | 0.847 | 0.874   | 0.887   | 0.893  |
| GSIR                      | 0.706   | 0.543   | 0.804  | 0.716 | 0.586    | 0.867 | 0.839   | 0.867   | 0.883  |
| Ours (3 <sup>3</sup> SGs) | 0.734   | 0.561   | 0.826  | 0.665 | 0.586    | 0.906 | 0.883   | 0.910   | 0.923  |

Table 2. SSIM scores for Mip-NeRF360 scenes.

| Method                    | bicycle | flowers | garden | stump | treehill | room  | counter | kitchen | bonsai |
|---------------------------|---------|---------|--------|-------|----------|-------|---------|---------|--------|
| NeRF++                    | 0.455   | 0.466   | 0.331  | 0.416 | 0.466    | 0.335 | 0.351   | 0.260   | 0.291  |
| Plenoxels                 | 0.506   | 0.521   | 0.386  | 0.503 | 0.540    | 0.419 | 0.441   | 0.447   | 0.398  |
| INGP-Base                 | 0.487   | 0.481   | 0.312  | 0.450 | 0.489    | 0.301 | 0.342   | 0.254   | 0.227  |
| INGP-Big                  | 0.446   | 0.441   | 0.257  | 0.421 | 0.450    | 0.261 | 0.306   | 0.195   | 0.205  |
| Mip-NeRF 360              | 0.289   | 0.345   | 0.164  | 0.254 | 0.338    | 0.211 | 0.203   | 0.126   | 0.177  |
| 3DGS                      | 0.205   | 0.336   | 0.103  | 0.210 | 0.317    | 0.220 | 0.204   | 0.129   | 0.205  |
| 2DGS                      | 0.218   | 0.346   | 0.115  | 0.222 | 0.329    | 0.223 | 0.208   | 0.133   | 0.214  |
| GaussianShader            | 0.274   | 0.377   | 0.130  | 0.297 | 0.406    | 0.304 | 0.242   | 0.167   | 0.257  |
| GSIR                      | 0.259   | 0.371   | 0.158  | 0.258 | 0.372    | 0.279 | 0.260   | 0.188   | 0.264  |
| Ours (3 <sup>3</sup> SGs) | 0.249   | 0.368   | 0.144  | 0.329 | 0.400    | 0.235 | 0.229   | 0.146   | 0.226  |

Table 3. LPIPS scores for Mip-NeRF360 scenes.

| Method                    | Trucks | Train | Avg.  | Drjohnson | Playroom | Avg.  |
|---------------------------|--------|-------|-------|-----------|----------|-------|
| 3DGS                      | 25.18  | 21.09 | 23.13 | 28.76     | 30.04    | 29.40 |
| 2DGS                      | 24.78  | 21.67 | 23.22 | 29.02     | 30.23    | 29.62 |
| GaussianShader            | 20.13  | 23.56 | 21.84 | 22.18     | 19.88    | 21.03 |
| GSIR                      | 24.09  | 20.42 | 22.25 | 26.47     | 28.13    | 27.30 |
| Ours (3 <sup>3</sup> SGs) | 24.51  | 23.60 | 22.71 | 28.05     | 28.55    | 28.30 |

Table 4. PSNR scores for DB and T&T Dataset.

| Method                    | Trucks | Train | Avg.  | Drjohnson | Playroom | Avg.  |
|---------------------------|--------|-------|-------|-----------|----------|-------|
| 3DGS                      | 0.879  | 0.802 | 0.840 | 0.899     | 0.906    | 0.902 |
| 2DGS                      | 0.867  | 0.803 | 0.835 | 0.901     | 0.907    | 0.904 |
| GaussianShader            | 0.763  | 0.843 | 0.803 | 0.786     | 0.845    | 0.815 |
| GSIR                      | 0.833  | 0.742 | 0.787 | 0.863     | 0.869    | 0.866 |
| Ours (3 <sup>3</sup> SGs) | 0.858  | 0.778 | 0.818 | 0.886     | 0.885    | 0.885 |

Table 5. SSIM scores for DB and T&T Dataset.

| Method                    | Trucks | Train | Avg.  | Drjohnson | Playroom | Avg.  |
|---------------------------|--------|-------|-------|-----------|----------|-------|
| 3DGS                      | 0.148  | 0.218 | 0.183 | 0.244     | 0.241    | 0.242 |
| 2DGS                      | 0.183  | 0.227 | 0.205 | 0.248     | 0.250    | 0.249 |
| GaussianShader            | 0.271  | 0.191 | 0.231 | 0.336     | 0.359    | 0.344 |
| GSIR                      | 0.195  | 0.273 | 0.234 | 0.314     | 0.305    | 0.309 |
| Ours (3 <sup>3</sup> SGs) | 0.182  | 0.250 | 0.216 | 0.268     | 0.271    | 0.269 |

Table 6. LPIPS scores for DB and T&T Dataset.

positions, and SG parameters of light sources can be independently modified. This explicit emissive formulation enables physically plausible and interactive light editing, as shown in Figure 4 and the accompanying video.

**Composition** Our method models the scene’s illumination as a combination of localized and environment lighting, allowing for complete illumination decomposition. This decomposition enables seamless integration of relightable content across different scenes. As demonstrated

|           |                    | Normal (MAE) | Albedo |       |        | Novel View Synthesis |       |       |
|-----------|--------------------|--------------|--------|-------|--------|----------------------|-------|-------|
|           |                    |              | PSNR   | SSIM  | LPIPS  | PSNR                 | SSIM  | LPIPS |
| Lego      | InvRender          | 9.980        | 21.435 | 0.882 | 0.160  | 24.391               | 0.883 | 0.151 |
|           | TensoIR            | 5.980        | 25.240 | 0.900 | 0.145  | 34.700               | 0.968 | 0.037 |
|           | GS-IR              | 8.078        | 24.958 | 0.889 | 0.143  | 34.379               | 0.968 | 0.036 |
|           | Ours ( $3^3$ SGMs) | 7.595        | 25.155 | 0.911 | 0.138  | 37.377               | 0.975 | 0.023 |
| Hotdog    | InvRender          | 3.708        | 27.028 | 0.950 | 0.094  | 31.832               | 0.952 | 0.089 |
|           | TensoIR            | 4.050        | 30.370 | 0.947 | 0.093  | 36.820               | 0.976 | 0.045 |
|           | GS-IR              | 4.771        | 26.745 | 0.941 | 0.088  | 34.116               | 0.972 | 0.049 |
|           | Ours ( $3^3$ SGMs) | 4.269        | 31.546 | 0.949 | 0.0874 | 37.599               | 0.983 | 0.024 |
| Armadillo | InvRender          | 1.723        | 35.573 | 0.959 | 0.076  | 31.116               | 0.968 | 0.057 |
|           | TensoIR            | 1.950        | 34.360 | 0.989 | 0.059  | 39.050               | 0.986 | 0.039 |
|           | GS-IR              | 2.176        | 38.572 | 0.986 | 0.051  | 39.287               | 0.980 | 0.039 |
|           | Ours ( $3^3$ SGMs) | 2.927        | 44.585 | 0.986 | 0.044  | 43.858               | 0.988 | 0.024 |
| Ficus     | InvRender          | 4.884        | 25.335 | 0.942 | 0.072  | 22.131               | 0.934 | 0.057 |
|           | TensoIR            | 4.420        | 27.130 | 0.964 | 0.044  | 29.780               | 0.973 | 0.041 |
|           | GS-IR              | 4.762        | 30.867 | 0.948 | 0.053  | 33.551               | 0.976 | 0.031 |
|           | Ours ( $3^3$ SGMs) | 3.681        | 32.702 | 0.959 | 0.049  | 37.681               | 0.990 | 0.008 |

Table 7. Per-scene results on TensoIR Synthetic dataset. For albedo reconstruction results, we follow NeRFactor and scale each RGB channel using a global scalar.

|           |                    | Albedo |       |        | Novel View Synthesis |       |       |
|-----------|--------------------|--------|-------|--------|----------------------|-------|-------|
|           |                    | PSNR   | SSIM  | LPIPS  | PSNR                 | SSIM  | LPIPS |
| Donut     | GS-IR              | 25.224 | 0.949 | 0.029  | 35.171               | 0.975 | 0.046 |
|           | GSshader           | 24.138 | 0.941 | 0.031  | 34.171               | 0.971 | 0.047 |
|           | RelightGS          | 27.315 | 0.959 | 0.025  | 37.414               | 0.988 | 0.019 |
|           | Ours ( $3^3$ SGMs) | 28.515 | 0.969 | 0.0216 | 38.414               | 0.989 | 0.018 |
| Figurine  | GS-IR              | 25.224 | 0.949 | 0.029  | 35.171               | 0.975 | 0.046 |
|           | GSshader           | 28.563 | 0.905 | 0.059  | 37.709               | 0.961 | 0.048 |
|           | RelightGS          | 31.295 | 0.972 | 0.046  | 41.933               | 0.992 | 0.011 |
|           | Ours ( $3^3$ SGMs) | 30.895 | 0.963 | 0.048  | 40.633               | 0.986 | 0.012 |
| Birdhouse | GS-IR              | 26.584 | 0.906 | 0.121  | 35.814               | 0.972 | 0.035 |
|           | GSshader           | 23.584 | 0.890 | 0.125  | 34.991               | 0.968 | 0.039 |
|           | RelightGS          | 28.011 | 0.933 | 0.094  | 38.287               | 0.986 | 0.012 |
|           | Ours ( $3^3$ SGMs) | 26.084 | 0.926 | 0.101  | 38.021               | 0.982 | 0.013 |
| Table     | GS-IR              | 25.718 | 0.938 | 0.063  | 38.439               | 0.972 | 0.036 |
|           | GSshader           | 25.213 | 0.912 | 0.064  | 38.123               | 0.969 | 0.038 |
|           | RelightGS          | 27.132 | 0.948 | 0.062  | 43.280               | 0.996 | 0.006 |
|           | Ours ( $3^3$ SGMs) | 29.752 | 0.958 | 0.055  | 44.581               | 0.994 | 0.006 |

Table 8. Per-scene results on ADT dataset. For albedo reconstruction results, we follow NeRFactor and scale each RGB channel using a global scalar.

in Figure 5 and the video, we incorporate a decomposed TensoIR-synthesized object into a real-world Mip-NeRF scene, achieving realistic lighting consistency.

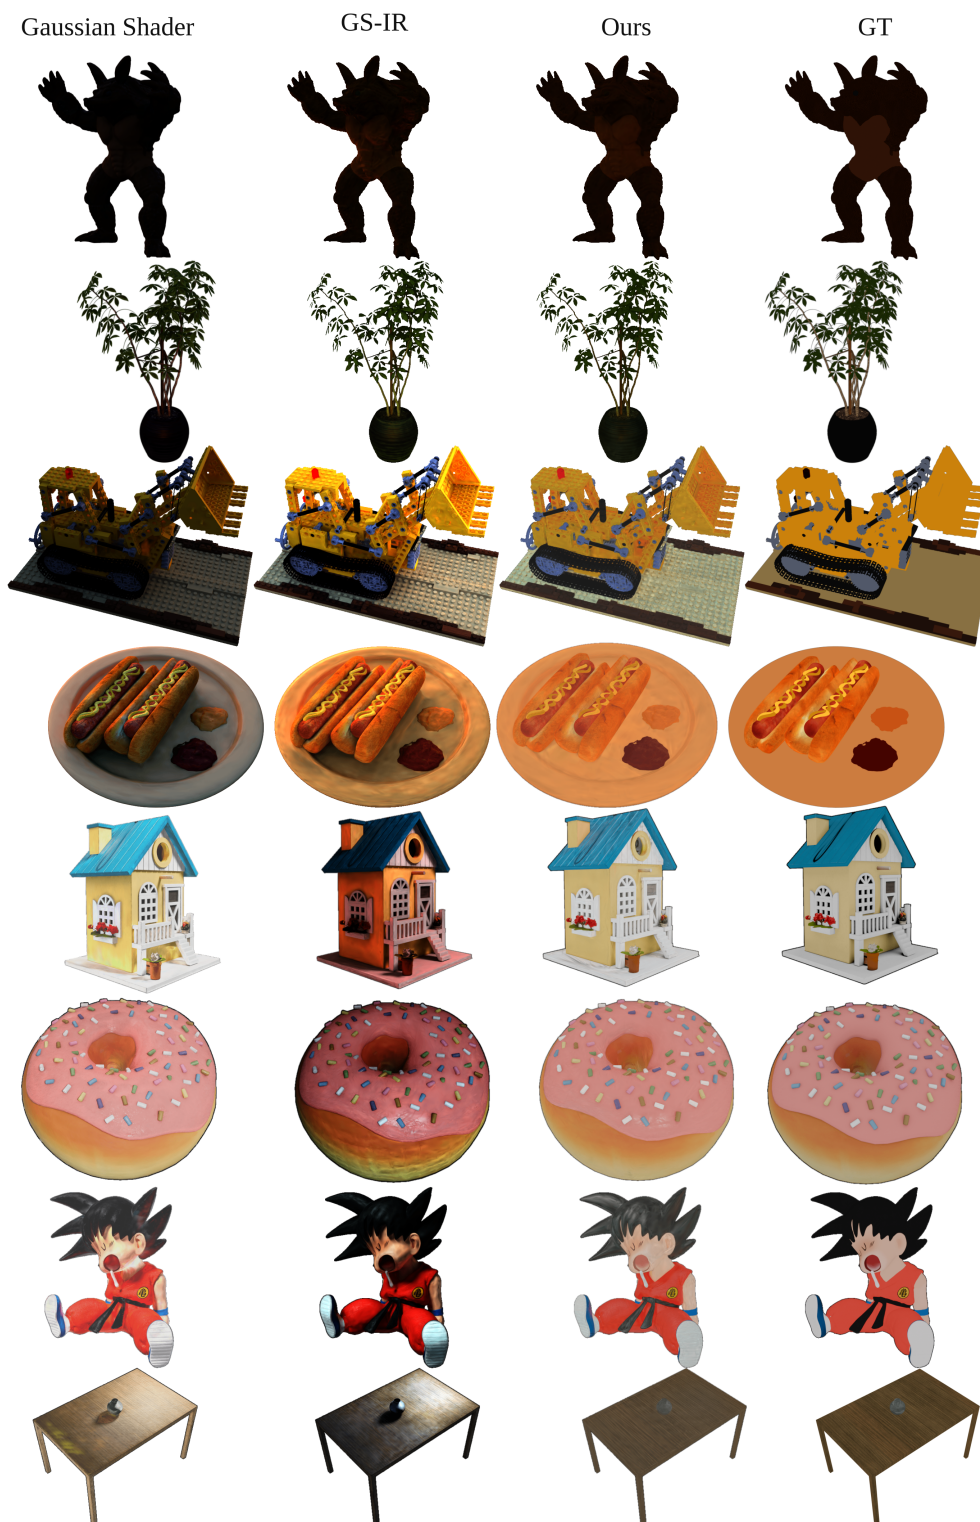

Figure 2. Visualization of our albedo estimation results with other methods on the TensoIR synthetic and ADT dataset.

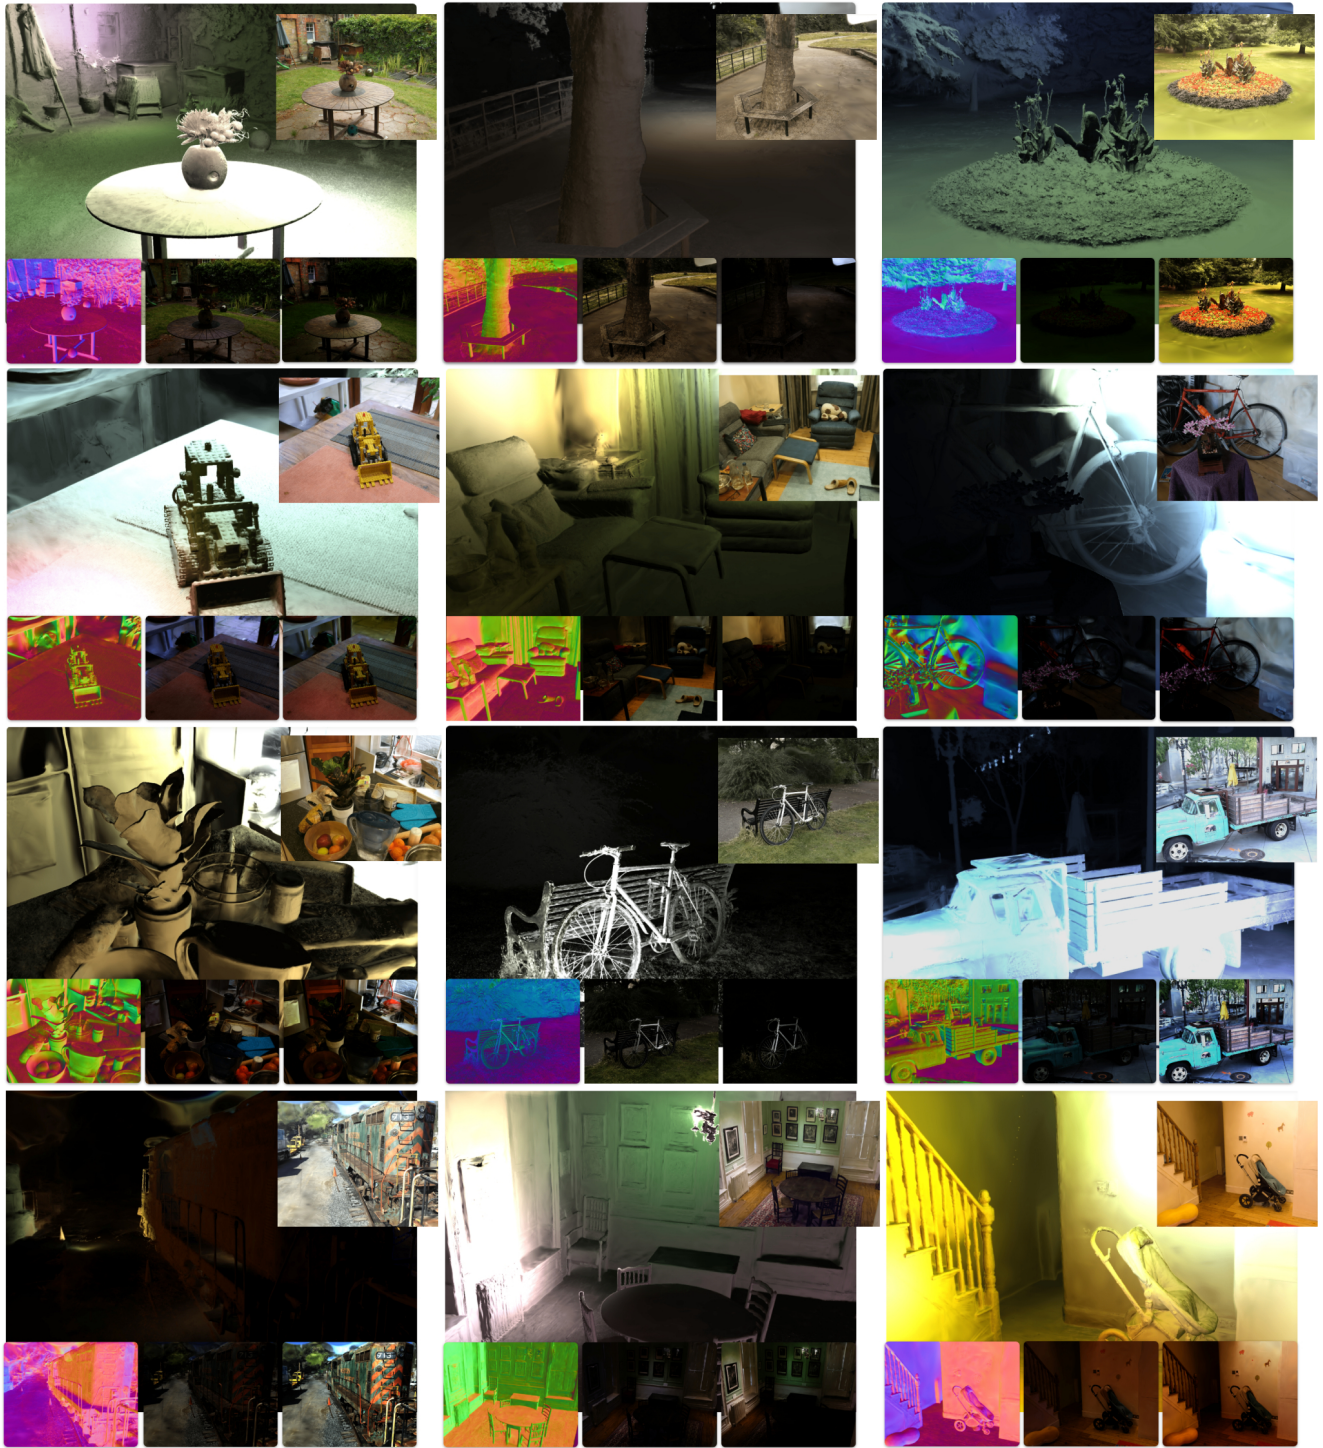

Figure 3. Visualization of our illumination decomposition results on the Mip-NeRF 360, DeepBlending, and T&T datasets. The main image shows the average of all effective pure localized light in the scene, while other smaller images include the normal map, environment light, localized light, and ambient occlusion.

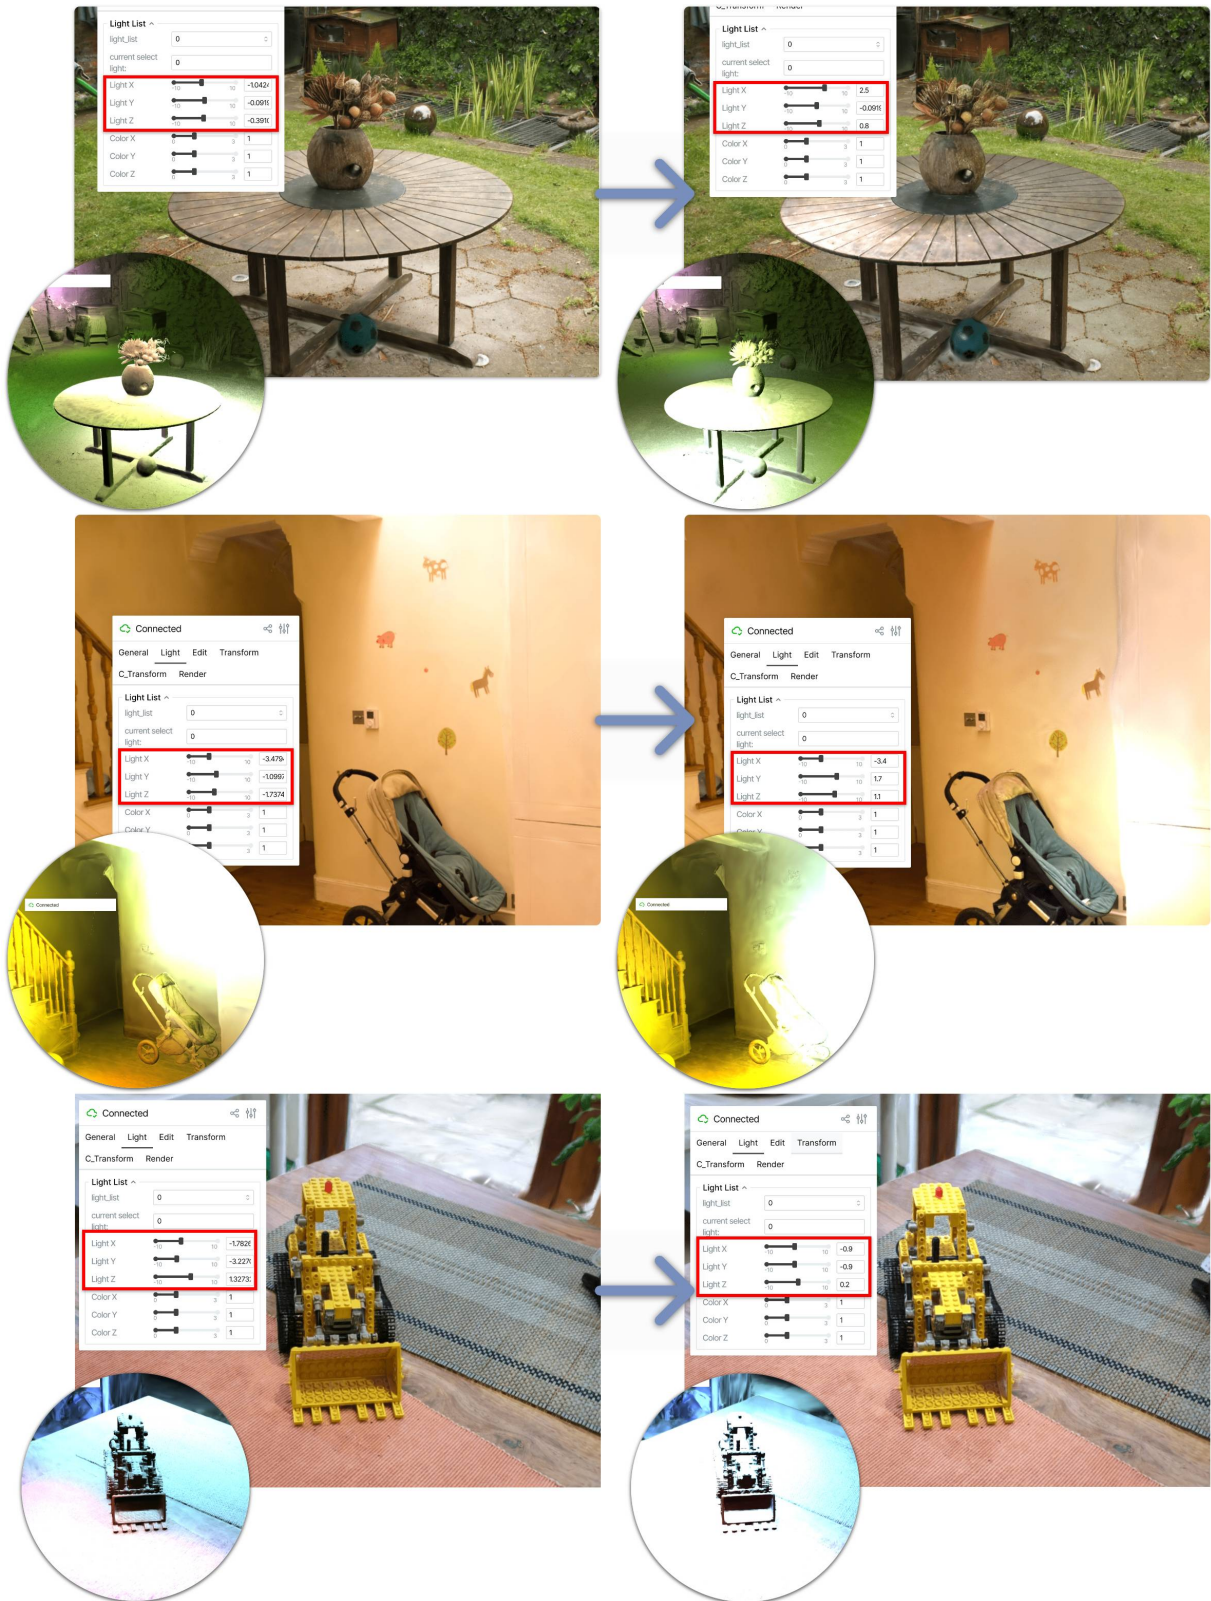

Figure 4. Visualization of light editing results.

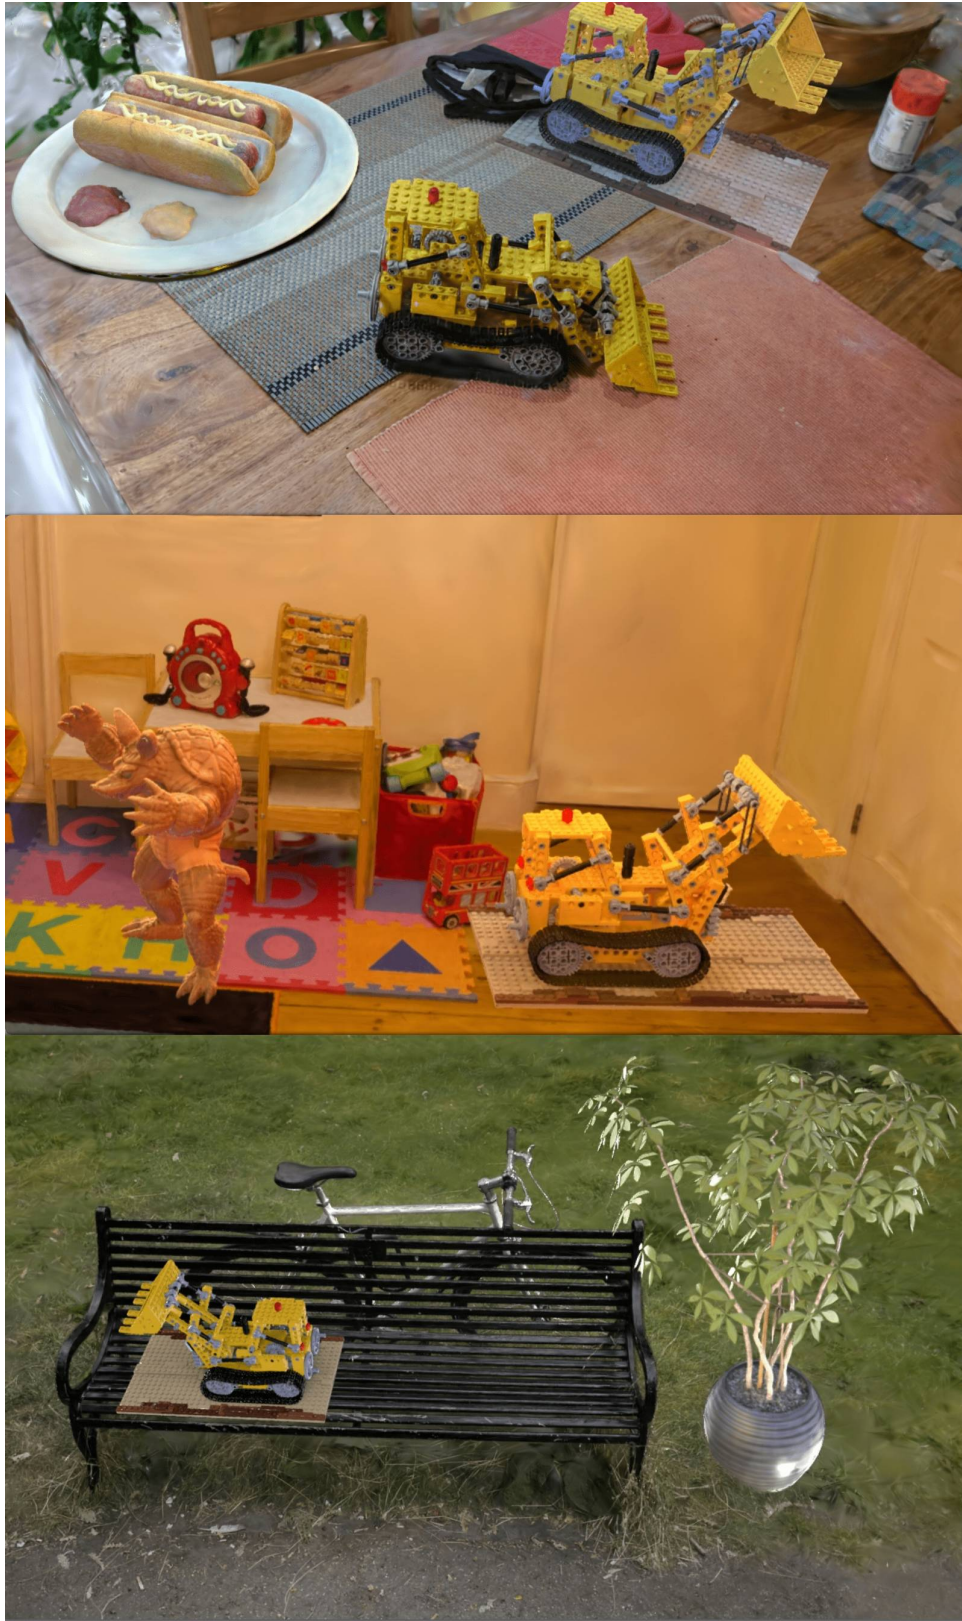

Figure 5. Visualization of scene composition results.
